# Supplementary material
Source: Springer Nature journal article supplement (https://www.springermedizin.de/resource/supplementary/12985_2011_1508_MOESM5_ESM.pdf/9609980)

A

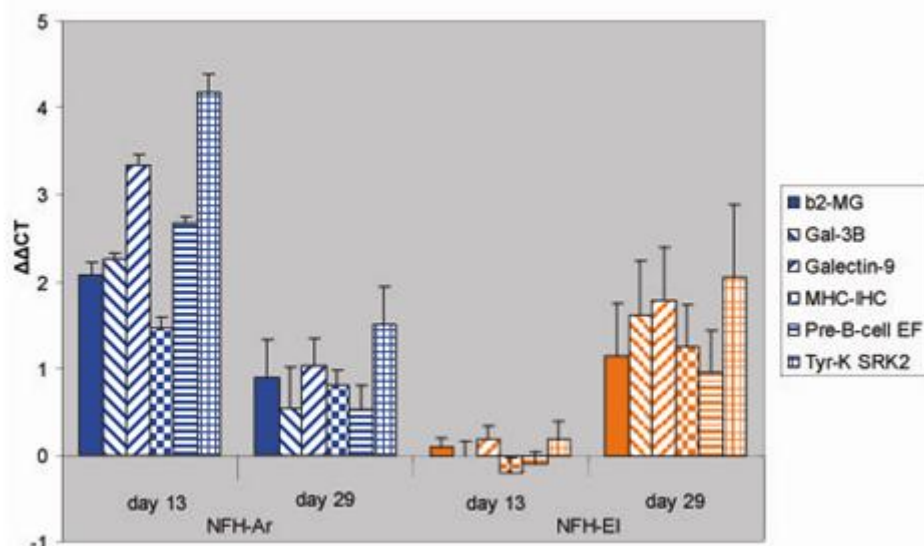

B

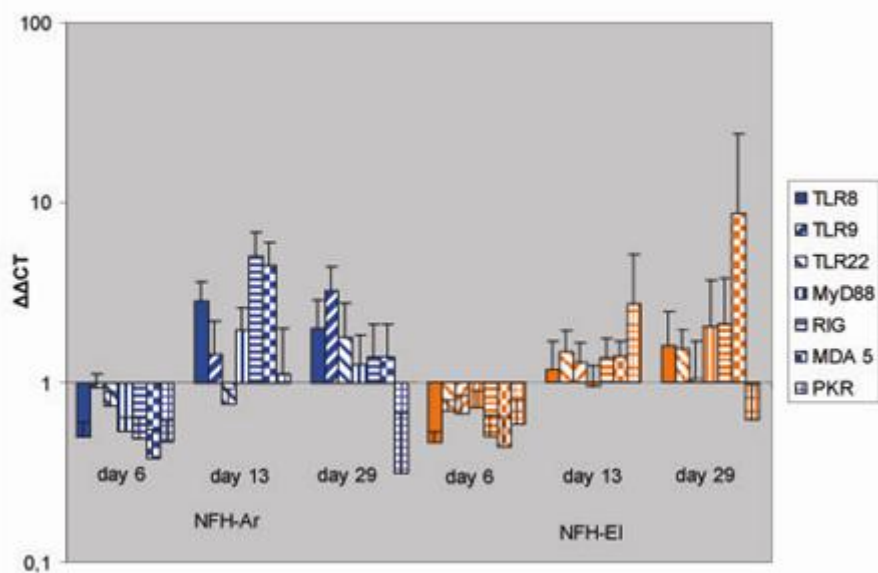

C

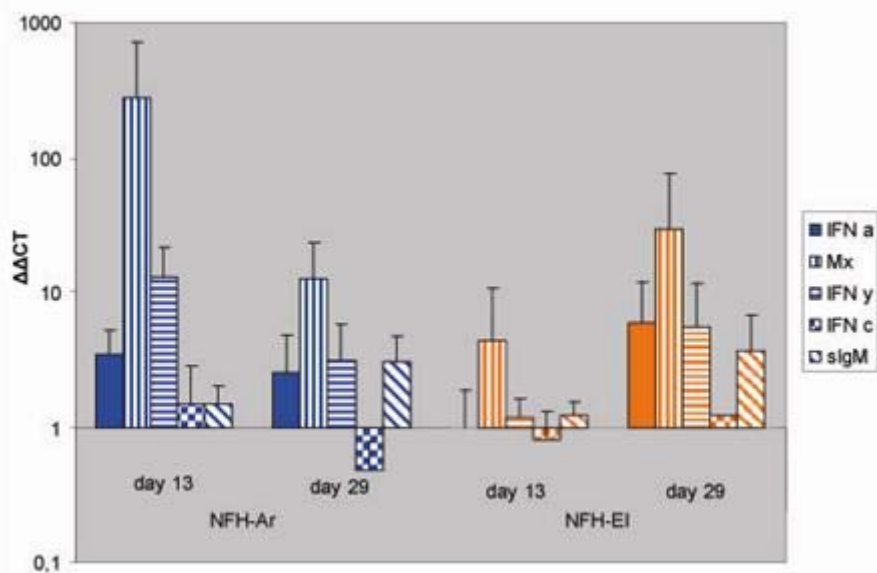

Supplement: MOESM5 [file 9609980]
